# Supplementary material for: Sources of Information and Behavioral Patterns in Online Health Forums: Observational Study
Source: PubMed Central journal article supplement (PMC3958625; doi:10.2196/jmir.2875), 2014-01-14
Supplement: jmir_v16i1e10_app3.pdf [file jmir_v16i1e10_app3.pdf]

Table 1: Aggregated number of references posted to each domain class from each cluster.

Unnormalized values.

|                      | Users of Uncommon Sources | Organization Followers | Seekers of Health Care | Social Media Fans | Homepage Promoters | Balanced Source Users |
|----------------------|---------------------------|------------------------|------------------------|-------------------|--------------------|-----------------------|
| commerce             | 9                         | 2                      | 1                      | 18                | 1                  | 14                    |
| news                 | 16                        | 13                     | 2                      | 80                | 10                 | <b>64</b>             |
| organization         | 29                        | <b>54</b>              | 2                      | 110               | 5                  | <b>50</b>             |
| other                | <b>44</b>                 | 1                      | 0                      | 44                | 0                  | 22                    |
| personal             | 11                        | 5                      | 0                      | 21                | <b>46</b>          | 8                     |
| scientific           | 12                        | 10                     | 1                      | 65                | 0                  | <b>53</b>             |
| social               | 31                        | 6                      | 6                      | <b>540</b>        | 14                 | <b>76</b>             |
| healthcare providers | 10                        | 0                      | <b>16</b>              | 32                | 1                  | 11                    |

Table 2: Arithmetic mean and (standard deviation) of the contribution behavior feature values for each cluster. Unnormalized Values.

|                                              | Soph. Contr.             | CCSVI Act.              | CCSVI-F. Resp.          | Short-l. CCSVI-Sp.      | H.A.R.P.                | Avg. Users       |
|----------------------------------------------|--------------------------|-------------------------|-------------------------|-------------------------|-------------------------|------------------|
| Average message length                       | <b>1293.9</b><br>(387.7) | 380.5<br>(168.6)        | 496.0<br>(268.6)        | <b>271.0</b><br>(097.7) | 510.8<br>(338.4)        | 448.0<br>(226.6) |
| Average number of references per post        | <b>0.917</b><br>(0.280)  | <b>0.533</b><br>(0.254) | 0.150<br>(0.141)        | 0.050<br>(0.087)        | 0.202<br>(0.159)        | 0.185<br>(0.178) |
| Average number of posts per day              | 0.301<br>(0.272)         | 0.560<br>(0.537)        | <b>0.246</b><br>(0.222) | <b>5.667</b><br>(1.958) | <b>3.971</b><br>(1.907) | 0.593<br>(0.580) |
| Average number of threads per day            | 0.061<br>(0.038)         | 0.255<br>(0.217)        | 0.147<br>(0.122)        | 0.958<br>(0.298)        | <b>1.339</b><br>(0.418) | 0.239<br>(0.201) |
| Days Active                                  | 467.0<br>(325.1)         | 515.2<br>(447.1)        | 292.0<br>(293.0)        | <b>1.750</b><br>(0.829) | 554.1<br>(441.2)        | 793.1<br>(427.5) |
| Fraction of posts that were cited            | 0.131<br>(0.111)         | 0.164<br>(0.150)        | 0.210<br>(0.146)        | 0.330<br>(0.196)        | 0.202<br>(0.059)        | 0.149<br>(0.103) |
| Fraction of relevant posts                   | 0.264<br>(0.213)         | <b>0.379</b><br>(0.159) | 0.534<br>(0.156)        | <b>0.839</b><br>(0.278) | 0.099<br>(0.069)        | 0.104<br>(0.092) |
| Fraction of initiated threads                | 0.309<br>(0.257)         | <b>0.458</b><br>(0.130) | <b>0.089</b><br>(0.097) | 0.000<br>(0.000)        | <b>0.064</b><br>(0.108) | 0.117<br>(0.089) |
| Coverage of users in relevant parts per post | 0.351<br>(0.236)         | <b>0.500</b><br>(0.377) | <b>1.143</b><br>(0.765) | <b>1.078</b><br>(0.517) | 0.061<br>(0.074)        | 0.178<br>(0.168) |
