# Supplementary material for: Sources of Information and Behavioral Patterns in Online Health Forums: Observational Study
Source: PubMed Central journal article supplement (PMC3958625; doi:10.2196/jmir.2875), 2014-01-14
Supplement: jmir_v16i1e10_app4.pdf [file jmir_v16i1e10_app4.pdf]

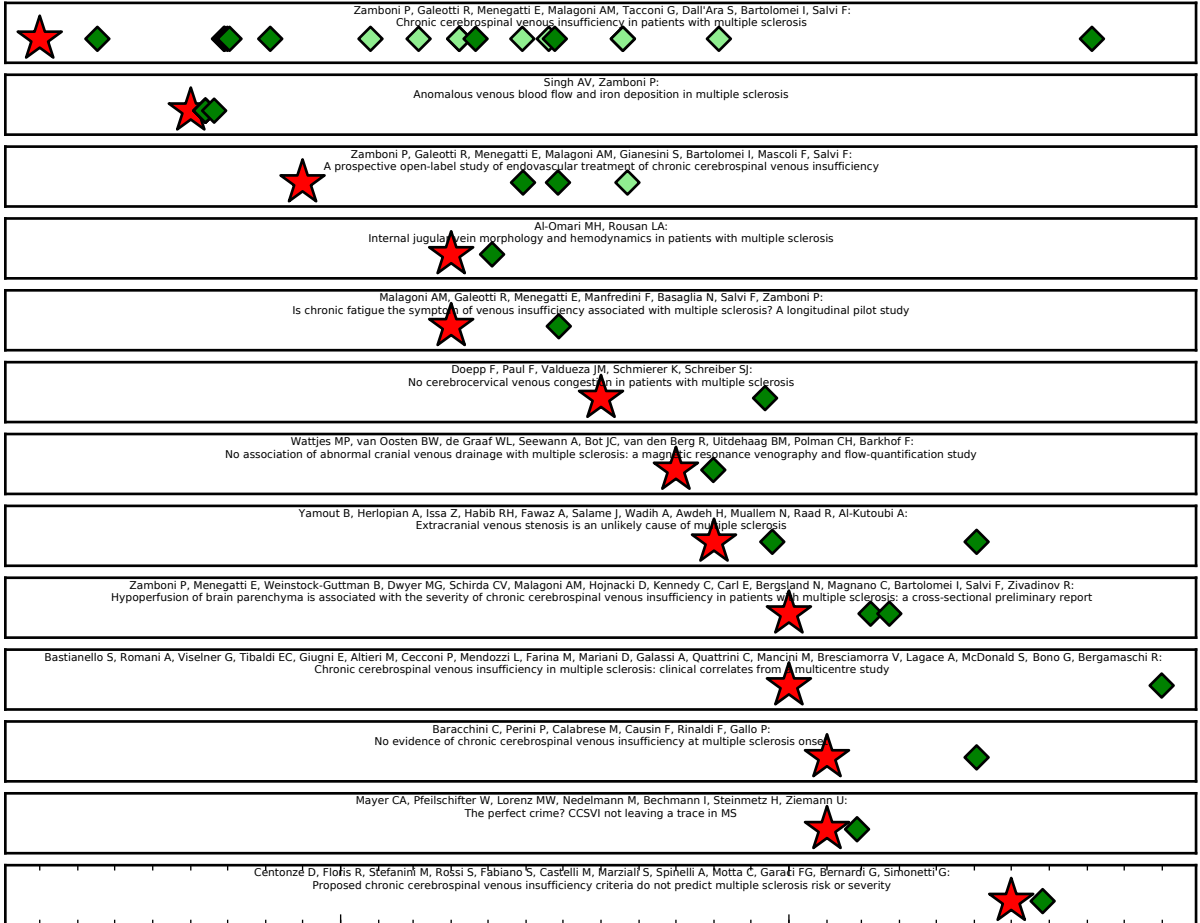

Each publication is shown in a separate area where the red star indicates the publication date and the green diamonds show dates where links to the publication were posted. Light green diamonds indicate indirect references.
